# Supplementary material
Source: publisher site journal article supplement (https://www.dovepress.com/article/313771)
Supplement: Supplementary file 1 [file get_supplementary_file.php]

**Appendix 1:** **Residents/cancer patient survey questionnaire and value assignment**

Reference number:

**Part A Socio-demographics**

Q1.1 Name:

Q1.2 Sex: 1=male; 2=female

Q1.3 Date of birth: / / （MM/DD/YY）

Q1.4 Education: 1=illiterate; 2=primary schooling; 3=middle schooling; 4=secondary schooling; 5= college schooling; 6=higher schooling or above

Q1.5 Residence: 1=urban area; 2=rural area

**Part B Digestive tract symptoms and diagnoses for residents**

Q2.1 Have you ever experienced gastroesophageal reflux?

1=Yes 0=No (skip to Q2.2)

Q2.1.1 How many years have you suffered from gastroesophageal reflux？

years

Q2.1.2 How many days did you have gastroesophageal reflux in a month?

days

Q2.2 Have you experienced odynophagia (excluding pharyngitis)?

1=Yes

0=No (skip to Q2.3)

Q2.2.1 How many years have you suffered from odynophagia？

years

Q2.2.2 At worst, how many days did you have odynophagia in a month?

days

Q2.3 Have you experienced stomach discomfort?

1=Yes

0=No (skip to Q2.4)

Q2.3.1 How many years have you suffered from stomach discomfort？

years

Q2.3.2 At worst, how many days did you have stomach discomfort in a month?

days

Q2.4 Have you experienced poor appetite?

1=Yes

0=No (skip to Q2.5)

Q2.4.1 How many years have you suffered from poor appetite？

years

Q2.4.2 At worst, how many days did you have poor appetite in a month?

days

Q2.5 Have you been aversion to greasy food all the time?

1=Yes

0=No (skip to Q2.6)

Q2.6 Have you been diagnosed with chronic gastritis?

1=Yes

0=No (skip to Q2.7)

Q2.6.1 How many years have you suffered from chronic gastritis？

years

Q2.7 Have you had Helicobacter pylori infection?

1=Yes

0=No (skip to Q2.8)

Q2.7.1 How many years have you suffered from Helicobacter pylori infection？

years

Q2.8 Have you been diagnosed with appendicitis?

1=Yes

0=No (skip to Q2.9)

Q2.9 Have you often experienced constipation?

1=Yes

0=No (skip to Q2.10)

Q2.9.1 How many years have you suffered from constipation？

years

Q2.9.2 At worst, how many times did you have constipation in ten stools?

times

Q2.10 Have you had hemorrhoids?

1=Yes

0=No (end)

Q2.10.1 How many years have you suffered from hemorrhoids？

years

Q2.10.2 At worst, how many times did you have hemorrhoids attack in a month?

times

**Part C Digestive tract symptoms and diagnoses for cancer patients**

Q3.1 Before being diagnosed with gastric cancer, had you ever experienced gastroesophageal reflux?

1=Yes 0=No (skip to Q3.2)

Q3.1.1 How many years have you suffered from gastroesophageal reflux？

years

Q3.1.2 How many days did you have gastroesophageal reflux in a month?

days

Q3.2 Before being diagnosed with gastric cancer, had you experienced odynophagia (excluding pharyngitis)?

1=Yes

0=No (skip to Q3.3)

Q3.2.1 How many years have you suffered from odynophagia？

years

Q3.2.2 At worst, how many days did you have odynophagia in a month?

days

Q3.3 Before being diagnosed with gastric cancer, had you experienced stomach discomfort?

1=Yes

0=No (skip to Q3.4)

Q3.3.1 How many years have you suffered from stomach discomfort？

years

Q3.3.2 At worst, how many days did you have stomach discomfort in a month?

days

Q3.4 Before being diagnosed with gastric cancer, had you experienced poor appetite?

1=Yes

0=No (skip to Q3.5)

Q3.4.1 How many years have you suffered from poor appetite？

years

Q3.4.2 At worst, how many days did you have poor appetite in a month?

days

Q3.5 Before being diagnosed with gastric cancer, had you been aversion to greasy food all the time?

1=Yes

0=No (skip to Q3.6)

Q3.6 Before being diagnosed with gastric cancer, had you been diagnosed with chronic gastritis?

1=Yes

0=No (skip to Q3.7)

Q3.6.1 How many years have you suffered from chronic gastritis？

years

Q3.7 Before being diagnosed with gastric cancer, had you had Helicobacter pylori infection?

1=Yes

0=No (skip to Q3.8)

Q3.7.1 How many years have you suffered from Helicobacter pylori infection？

years

Q3.8 Before being diagnosed with gastric cancer, had you been diagnosed with appendicitis?

1=Yes

0=No (skip to Q3.9)

Q3.9 Before being diagnosed with gastric cancer, had you often experienced constipation?

1=Yes

0=No (skip to Q3.10)

Q3.9.1 How many years have you suffered from constipation？

years

Q3.9.2 At worst, how many times did you have constipation in ten stools?

times

Q3.10 Before being diagnosed with gastric cancer, had you had hemorrhoids?

1=Yes

0=No (end)

Q3.10.1 How many years have you suffered from hemorrhoids？

years

Q3.10.2 At worst, how many times did you have hemorrhoids attack in a month?

times
